# Supplementary material for: High-mobility group box 1 is involved in the initial events of early loss of transplanted islets in mice
Source: JCI journal article supplement (doi:10.1172/jci41360), 2010-02-01
Supplement: sd1 [file 1]

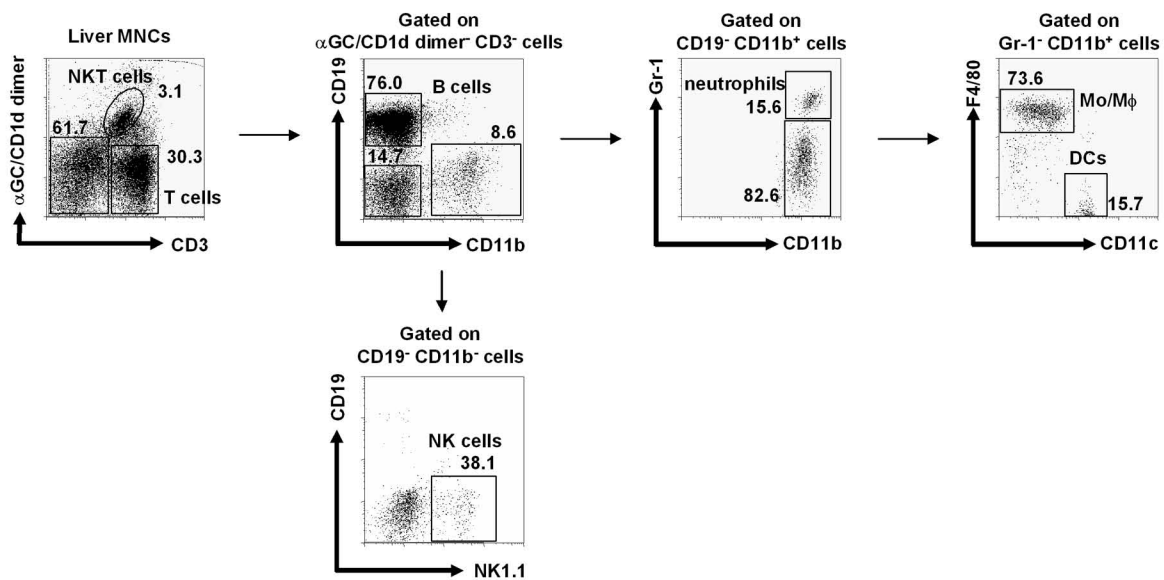

## Figure S1

Preparation of cell populations in the liver MNCs. NKT ( $\alpha$ GC/CD1d dimer<sup>+</sup>CD3<sup>+</sup>) and conventional T ( $\alpha$ GC/CD1d dimer<sup>-</sup>CD3<sup>+</sup>) cells were first separated. Then,  $\alpha$ GC/CD1d dimer<sup>-</sup>CD3<sup>+</sup> cells were separated to obtain B cells (CD19<sup>+</sup>CD11b<sup>-</sup>). NK cells were also sorted from CD19<sup>-</sup>CD11b<sup>-</sup> cells based on their expression of NK1.1. CD19<sup>-</sup>CD11b<sup>+</sup> cells were further divided based on the expression of Gr-1 and sorted Gr-1<sup>+</sup>CD11b<sup>+</sup> cells as Neu. Gr-1<sup>-</sup>CD11b<sup>+</sup> population was further sorted out into CD11c<sup>+</sup>F4/80<sup>+</sup> Mo/M $\phi$  and CD11c<sup>+</sup>F4/80<sup>-</sup> DCs. The cells thus sorted were used for the experiments shown in Figure 4 and Figure 5.
